# Supplementary material
Source: publisher figshare collection journal article supplement (https://acs.figshare.com/ndownloader/files/3849328)
Supplement: Supplementary file 1 [file 3849328]

## Supporting Information

Methylenation of Peptides by N,N,N,N-Tetramethylethylenediamine (TEMED)  
under Conditions Used for Free Radical Polymerization: A Mechanistic Study

Mehrnoosh Shirangi,<sup>†,¶</sup> Javier Sastre Toraño,<sup>‡</sup> Börje Sellergren,<sup>||</sup> Wim E. Hennink,<sup>†</sup>  
Govert W. Somsen,<sup>‡</sup> Cornelus F. van Nostrum<sup>\*,†</sup>

<sup>†</sup>Department of Pharmaceutics, Utrecht Institute for Pharmaceutical Sciences, Utrecht University, Utrecht, The Netherlands

<sup>‡</sup>Biomolecular Analysis, Utrecht Institute for Pharmaceutical Sciences, Utrecht University, Utrecht, The Netherlands

<sup>¶</sup>Current address: AIMMS Division of Biomolecular Analysis, VU University Amsterdam, Amsterdam, the Netherlands

<sup>§</sup> Institute of Environmental Research, Faculty of Chemistry, Technical University of Dortmund, Germany; current address: Department of Biomedical Sciences, Faculty of Health and Society, Malmö University, Sweden

<sup>||</sup>Department of Drug and Food Control, Faculty of Pharmacy, Tehran University of Medical science, Tehran, Iran

\*corresponding author: C.F.vanNostrum@uu.nl

## Table of Content

|                                                                                                               |   |
|---------------------------------------------------------------------------------------------------------------|---|
| <b>Figure S1</b> UPLC chromatogram of TP5; native and exposed to APS/TEMED                                    | 3 |
| <b>Figure S2</b> Tandem mass spectrum of dipeptide No.3 (Pro-Lys); (A) native,( B) modified                   | 3 |
| <b>Figure S3</b> Tandem mass spectrum of dipeptide No.5 (Cys-Lys); (A) native,( B) modified                   | 4 |
| <b>Figure S4</b> Tandem mass spectrum of dipeptide No.6 (Asn-Lys); (A) native,( B) modified                   | 4 |
| <b>Figure S5</b> Tandem mass spectrum of dipeptide No.7 (Gln-Lys) -NH <sub>3</sub> ; (A) native,( B) modified | 5 |
| <b>Figure S6</b> Tandem mass spectrum of dipeptide No.8 (Glu-Lys); (A) native,( B) modified                   | 5 |
| <b>Figure S7</b> Tandem mass spectrum of dipeptide No.9 (His-Lys); (A) native,( B) modified                   | 6 |
| <b>Figure S8</b> Tandem mass spectrum of dipeptide No.11 (Tyr-Lys); (A) native,( B) modified                  | 6 |
| <b>Figure S9</b> Tandem mass spectrum of dipeptide No.12 (Trp-Lys); (A) native,( B) modified                  | 7 |
| <b>Figure S10</b> Tandem mass spectrum of dipeptide No.14 (Asp-Lys); (A) native,( B) modified                 | 7 |
| <b>Table S1</b> Accurate mass measurements of thymopentin and its modified product                            | 7 |

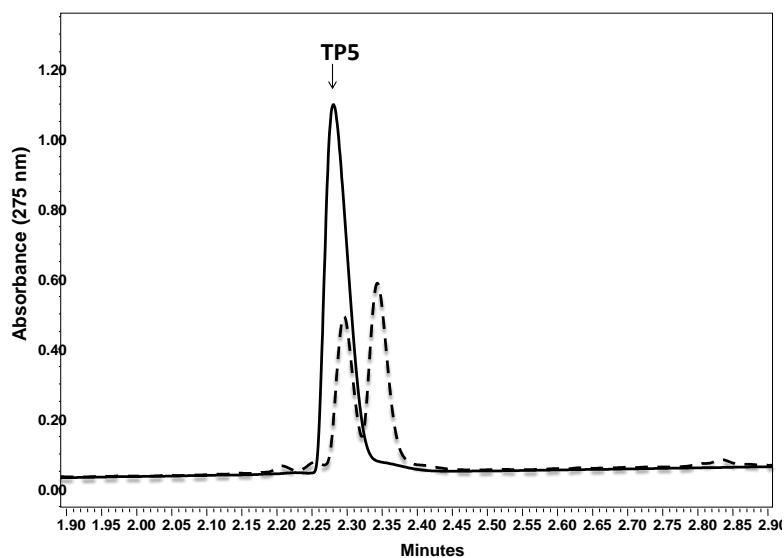

**Figure S1.** RP-UPLC chromatogram of native TP5 showing a single peak at 2.28 min (solid line), and extracted template after imprinting of TP5 in a polyacrylamide gel prepared by APS/TEMED at 50°C showing an additional degradation product at 2.36 min (dashed line).

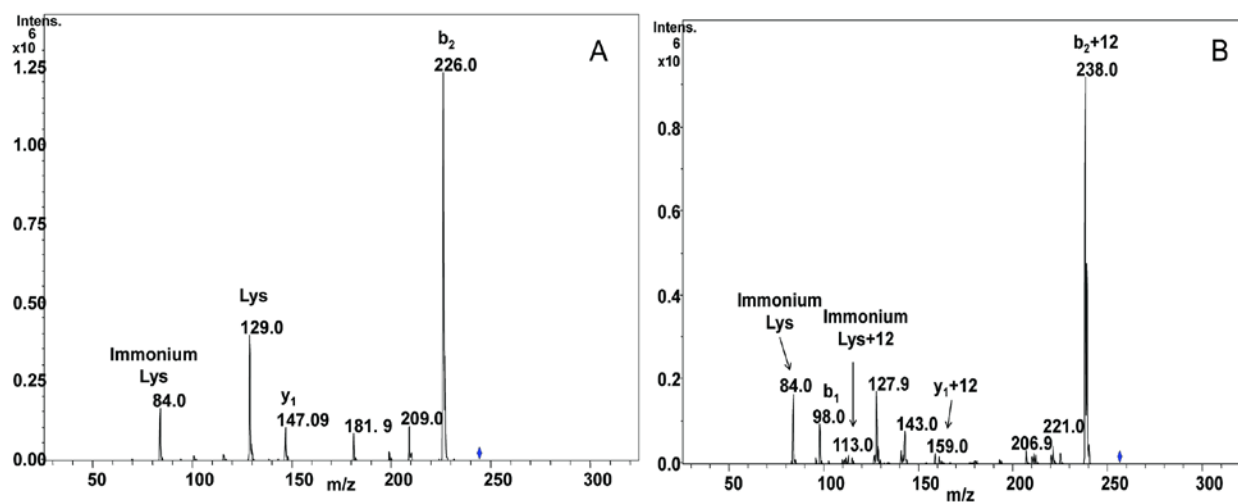

**Figure S2.** Tandem mass spectrum of dipeptide No.3 (Pro-Lys); (A) native, precursor ion at  $m/z$  244.0, (B) modified, precursor ion at  $m/z$  256.0.

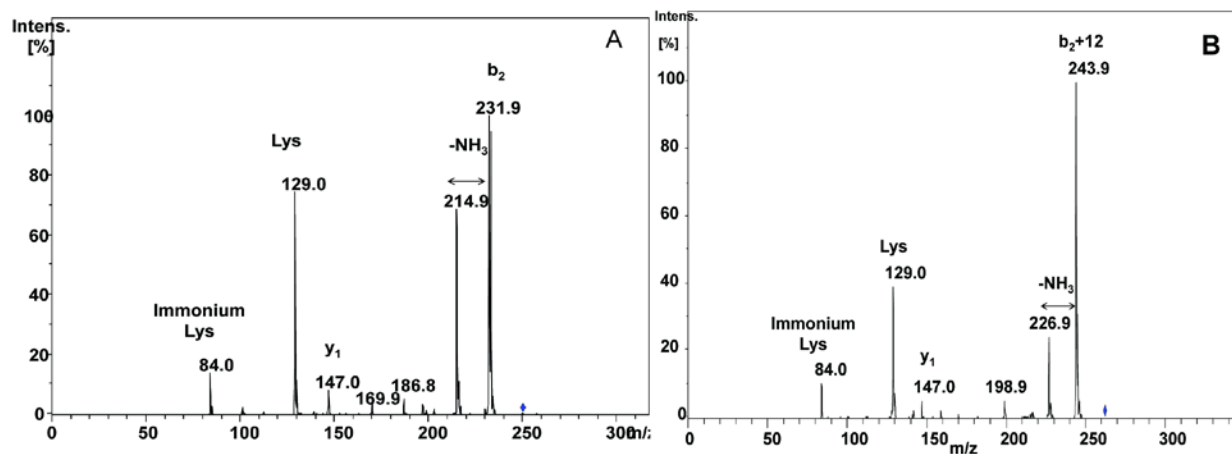

**Figure S3.** Tandem mass spectrum of dipeptide No.5 (Cys-Lys): (A) native, precursor ion at  $m/z$  249.9, (B) modified, precursor ion,  $m/z$  261.9.

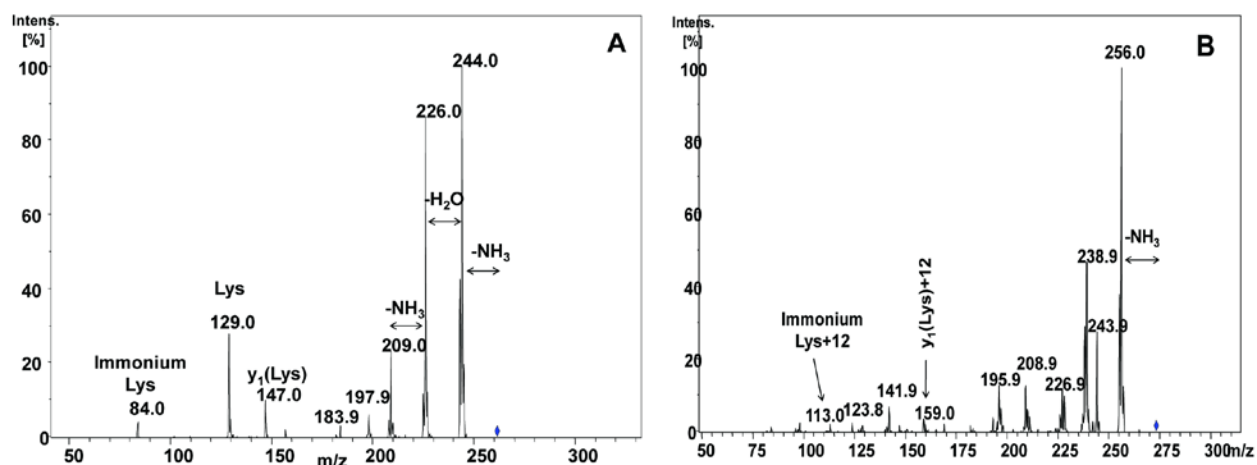

**Figure S4.** Tandem mass spectrum of dipeptide No.6 (Asn-Lys): (A) native, precursor ion at  $m/z$  261.0, (B) modified, precursor ion at  $m/z$  273.0

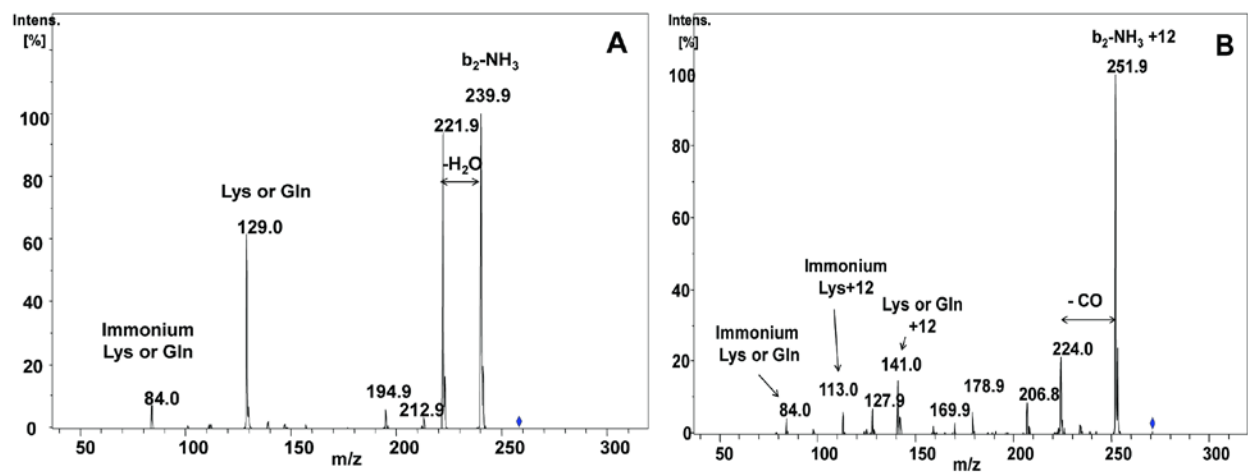

**Figure S5.** Tandem mass spectrum of dipeptide No.7 (Gln-Lys) -NH<sub>3</sub>: (A) native, precursor ion at m/z 258.0, (B) modified, precursor ion at m/z 270.0

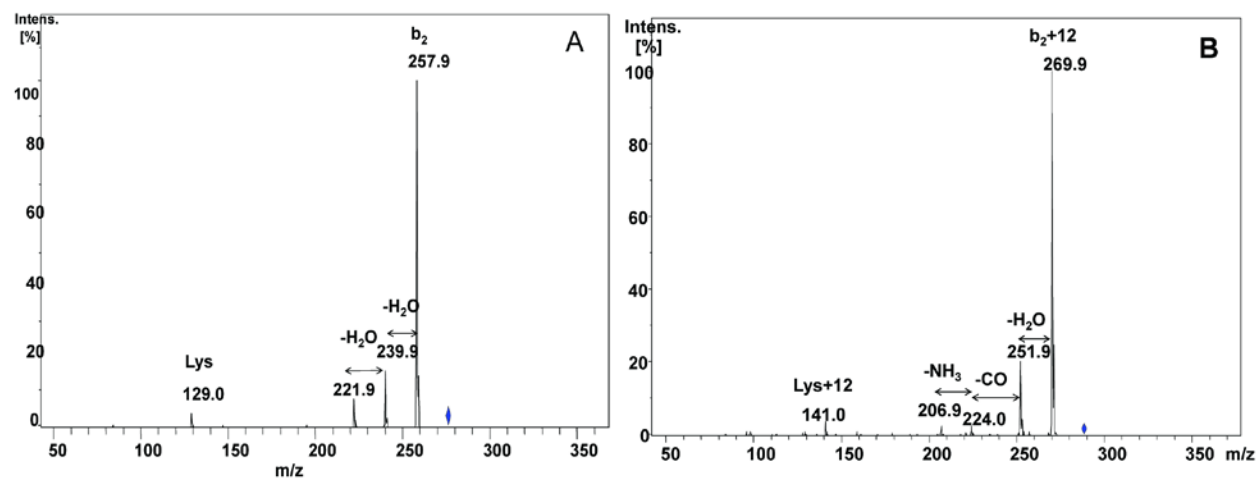

**Figure S6.** Tandem mass spectrum of dipeptide No.8 (Glu-Lys): (A) native, precursor ion at m/z 276.1, (B) modified, precursor ion at m/z 288.1.

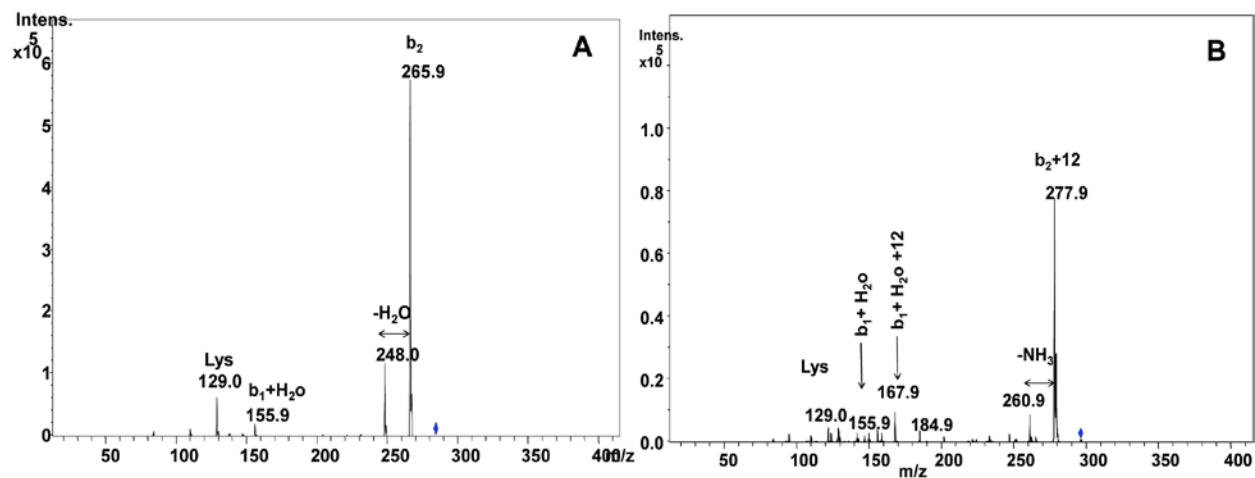

**Figure S7.** Tandem mass spectrum of dipeptide No.9 (His-Lys): (A) native, precursor ion at  $m/z$  283.0, (B) modified, precursor ion at  $m/z$  296.0.

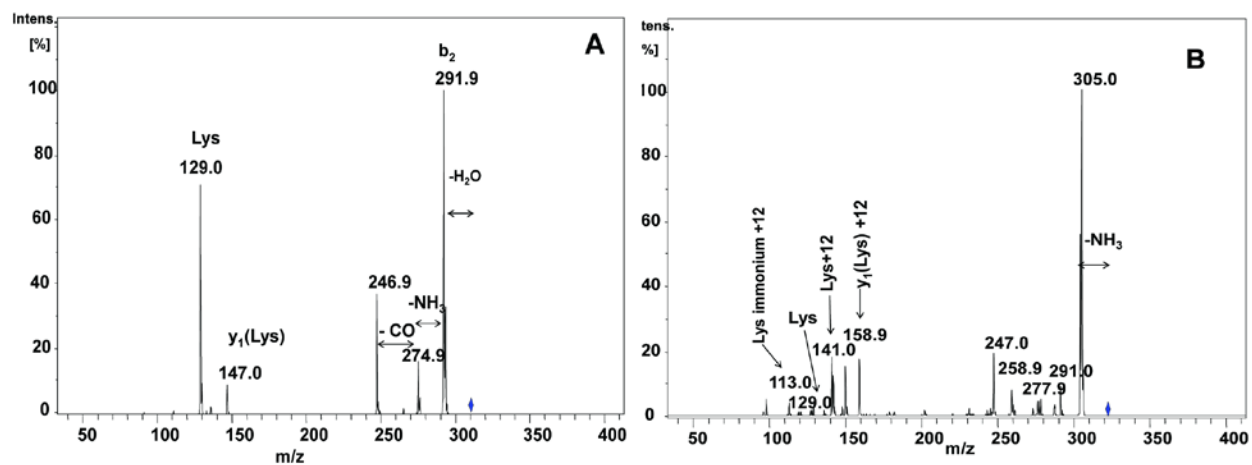

**Figure S8.** Tandem mass spectrum of dipeptide No.11 (Tyr-Lys): (A) native, precursor ion at  $m/z$  310.0, (B) modified, precursor ion at  $m/z$  322.0.

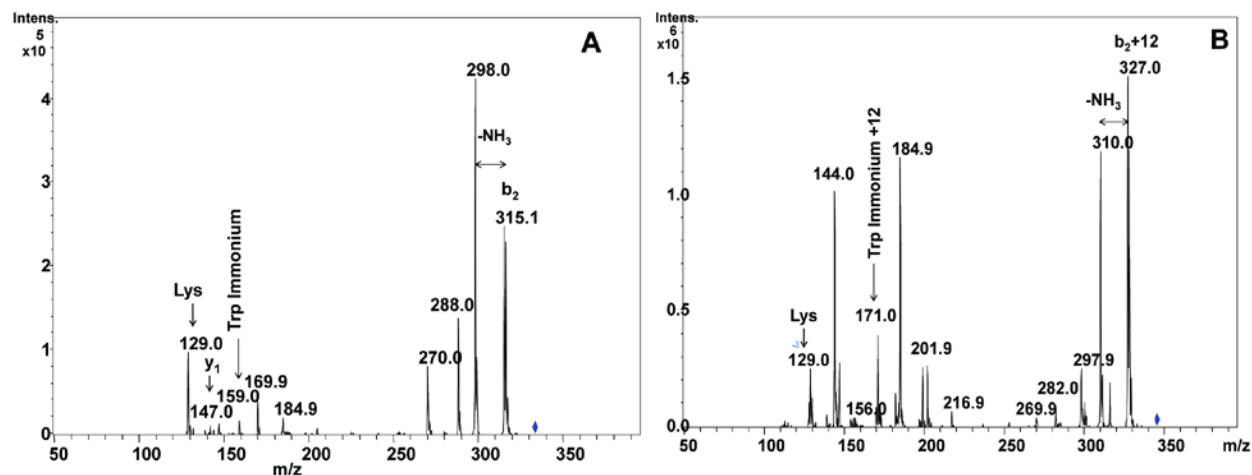

**Figure S9.** Tandem mass spectrum of dipeptide No.12 (Trp-Lys): (A) native, precursor ion at  $m/z$  333.0, (B) modified, precursor ion at  $m/z$  345.0.

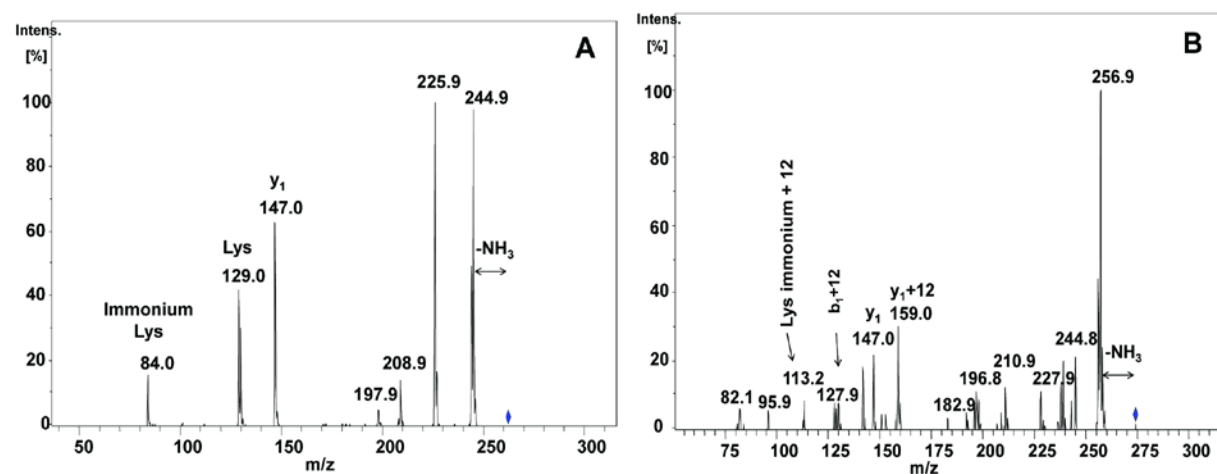

**Figure S10.** Tandem mass spectrum of dipeptide No.14 (Asp-Lys): (A) native, precursor ion at  $m/z$  262.0, (B) modified, precursor ion at  $m/z$  274.0.

**Table S1:** Accurate mass measurements of thymopentin and its modified product

| Name                    | Molecular formula          | Observed<br>$m/z$ | Calculated<br>$m/z$ | Error (mDa) |
|-------------------------|----------------------------|-------------------|---------------------|-------------|
| Thymopentin             | $[C_{30}H_{49}N_9O_9+H]^+$ | 680.3726          | 680.3726            | 0.0         |
| Modified<br>thymopentin | $[C_{31}H_{49}N_9O_9+H]^+$ | 692.3734          | 692.3726            | -0.8        |
